1 **Two avian *Plasmodium* species trigger different transcriptional responses**  
2 **on their vector *Culex pipiens***

3 **Running title:** *Cx. pipiens* response to avian *Plasmodium* infection

4

5 Garrigós M<sup>1,2\*</sup>, Ylla G<sup>3</sup>, Martínez-de la Puente J<sup>2,4</sup>, Figuerola J<sup>1,4</sup>, Ruiz-López  
6 MJ<sup>1,4</sup>.

7

8 <sup>1</sup> Department of Wetland Ecology, Estación Biológica de Doñana, CSIC, Sevilla  
9 (Spain).

10 <sup>2</sup> Department of Parasitology, University of Granada, Granada (Spain).

11 <sup>3</sup> Bioinformatics and Genome Biology Lab, Faculty of Biochemistry, Biophysics  
12 and Biotechnology, Jagiellonian University, Krakow (Poland).

13 <sup>4</sup>CIBER Epidemiología y Salud Pública (CIBERESP), Madrid (Spain).

14

15 \*Corresponding author: Marta Garrigós [garrigosm@ugr.es](mailto:garrigosm@ugr.es)

16

17 **Abstract**

18 Malaria is a mosquito-borne disease caused by protozoans of the genus  
19 *Plasmodium* that affects both humans and wildlife. The fitness consequences of  
20 infections by avian malaria are well known in birds, however, little information  
21 exists on its impact on mosquitoes. Here we study how *Culex pipiens*  
22 mosquitoes transcriptionally respond to infection by two different *Plasmodium*  
23 species, *P. relictum* and *P. cathemerium*, differing in their virulence (mortality  
24 rate) and transmissibility (parasite presence in exposed mosquitoes' saliva). We  
25 study the mosquito response to the infection at three critical stages of parasite  
26 development: formation of ookinetes at 24 hours post-infection (hpi), the release  
27 of sporozoites into the hemocoel at 10 days post-infection (dpi), and storage of  
28 sporozoites in the salivary glands at 21dpi. For each time point, we  
29 characterized the gene expression of mosquitoes infected with each *P. relictum*  
30 and *P. cathemerium* and mosquitoes fed on an uninfected bird and,  
31 subsequently, compared their transcriptomic responses. Differential gene  
32 expression analysis showed most of the transcriptomic changes occurred  
33 during the early infection stage (24 hpi), especially when comparing *P. relictum*  
34 and *P. cathemerium* infected mosquitoes. Differentially expressed genes in  
35 mosquitoes infected with each species were related mainly to the immune  
36 response, trypsin, and other serine-proteases metabolism. We conclude that  
37 these differences in response likely underlay the differential virulence and  
38 transmissibility previously observed in *P. relictum* and *P. cathemerium* in *Cx.*  
39 *pipiens*.

40 **Keywords:** avian malaria, *Plasmodium relictum*, *Plasmodium cathemerium*,  
41 vector-borne parasites, mosquito transcriptome, RNAseq.

## 42        **1. Introduction**

43        Vector-borne diseases are a major challenge for both human and animal health,  
44        representing around 25% of emerging infectious diseases. Mosquitoes are  
45        vectors of relevant pathogens including viruses that cause yellow fever, dengue,  
46        or West Nile fever and parasites such as nematode worms which cause  
47        lymphatic filariasis, and haemosporidians, like *Plasmodium*, which cause  
48        malaria (Lehane 2010). Malaria is one of the most important vector-borne  
49        diseases for humans, and only in 2020, it caused around 602,000 deaths (WHO  
50        2021). Malaria parasite species affect humans and related primates as well as  
51        other mammals, reptiles, or birds, driving some populations to extinction (van  
52        Riper et al. 1986).

53                Avian malaria is a worldwide distributed mosquito-borne disease caused  
54        by *Plasmodium* parasites which use birds as obligate hosts (Valkiūnas 2005).  
55        Avian *Plasmodium* is transmitted by mosquitoes, mainly of the genus *Culex*,  
56        which are the definitive hosts and where *Plasmodium* reproduces sexually  
57        (Valkiūnas 2005). In birds, as a part of their life cycle, *Plasmodium* merozoites  
58        invade the host erythrocytes and can differentiate into mature gametocytes  
59        (Sinden 1983). When a female mosquito feeds on a *Plasmodium*-infected bird,  
60        gametocytes are released from the erythrocytes, and male and female gametes  
61        unite resulting first in the zygote, and then in the motile ookinete (Sinden 2002).  
62        About 24 hours post-infection (hpi) the ookinete crosses the midgut epithelium  
63        and remains located between the epithelial surface and the basal lamina, where  
64        it transforms into a sessile oocyst. After about 10 days post-infection (dpi),  
65        mature oocysts liberate thousands of sporozoites into the hemocoel.  
66        Sporozoites that survive the immune system of the mosquito eventually invade

67 the salivary glands (Sinden 1983; Sinden 2002; Abraham and Jacobs-Lorena  
68 2004) from where they can be then transmitted to a new avian host upon a  
69 mosquito bite.

70 For an appropriate development and transmission of the parasites,  
71 mosquitoes susceptible to the infection need to survive it, allowing parasites to  
72 complete their life cycle. Thus, the nature of the interaction between pathogens  
73 and mosquitoes determines the ability of a vector to acquire, maintain and  
74 transmit parasites to a new host, i.e. the vector competence (Beerntsen et al.  
75 2000; Bonizzoni et al. 2013). Therefore, the vector competence is conditioned  
76 on the mosquito response against the pathogen (Higgs and Beaty 2005), which  
77 includes a number of defense mechanisms. After a blood meal, mosquitoes  
78 synthesize and release serine proteases that constitute a chemical barrier  
79 against pathogens (Vizioli et al. 2001; Molina-Cruz et al. 2005; Muller et al.  
80 1995) and form a chitin-containing peritrophic matrix around the blood. This  
81 matrix constitutes a physical barrier for harmful food particles, digestive  
82 enzymes, and pathogens (Lehane 1997). Despite the existence of these and  
83 other barriers, some pathogens manage to reach the mosquito midgut,  
84 hemocoel, or internal organs and activate the immune response, which may be  
85 categorized into cellular and humoral immune responses (Hillyer 2016). The  
86 cellular response includes mechanisms such as phagocytosis, cellular  
87 encapsulation, autophagy, melanization, and induction of apoptosis, while the  
88 humoral response consists of the activation of signaling pathways that  
89 eventually result in the synthesis of factors with antimicrobial activity (Michel  
90 and Kafatos 2005; Hillyer 2016). In insects, one of the main immune signaling  
91 pathways is the Toll pathway, which is activated by the Spätzle cytokine and

92 results in the activation of the transcription of antimicrobial peptides (AMPs) and  
93 other immune effectors that may combat pathogens (Kumar et al. 2018). In  
94 addition, two other pathways have been shown to be involved in the response  
95 to *Plasmodium*, including avian malaria parasites, the immune deficiency (Imd)  
96 and the Janus Kinase signal transducer of activation (JAK-STAT) (Clayton et al.  
97 2014, García-Longoria et al. 2022).

98         The infection by *Plasmodium* and the mosquito response against  
99 infection ultimately result in a cost to vectors (Ahmed et al. 2002), which might  
100 depend, among other factors, on which *Plasmodium* species infects the  
101 mosquito. For example, Gutiérrez-López et al. (2020), found a higher survival  
102 rate and transmissibility (measured as the presence of parasite DNA in the  
103 saliva of mosquitoes) in *Culex pipiens* infected with *Plasmodium cathemerium*  
104 compared to those infected with *Plasmodium relictum*. However, the genetic  
105 mechanisms that underlay these phenotypic differences are unknown. Part of  
106 the heterogeneity in parasite virulence and therefore in the fitness  
107 consequences in their hosts (Gutiérrez-López et al. 2020) is due to the  
108 remarkable cellular plasticity and transcriptional variation of *Plasmodium*  
109 (García-Longoria et al. 2020). Avian *Plasmodium* is an extremely diverse clade  
110 with at least 55 species (Valkiūnas and Iezhova 2018) divided into more than  
111 1,446 unique genetic lineages (Egerhill 2022). This extensive inter and intra-  
112 specific genomic variation will translate into different phenotypic characters,  
113 including differences of virulence, which will also determine how the mosquitoes  
114 respond to an infection.

115         Although studies on avian malaria that use transcriptomic approaches  
116 are increasing in the last few years, they have mainly focused on the avian host,

117 addressing either the bird response to infection (e.g. Videvall et al. 2015) or the  
118 gene expression of *Plasmodium* infecting birds (e.g. Videvall et al. 2017;  
119 García-Longoria et al. 2020; Videvall et al. 2021). In contrast, to the best of our  
120 knowledge, only three studies have analysed the gene expression of  
121 mosquitoes infected by avian *Plasmodium* (Zou et al. 2011; Ferreira et al. 2022;  
122 García-Longoria et al. 2022). However, none of them focus on *Cx. pipiens*,  
123 which is the main vector of avian *Plasmodium* in Europe. Another significant  
124 limitation is that all of these studies focus on *P. relictum* and consequently do  
125 not take into consideration the effect of the differences in virulence and  
126 transmissibility between *Plasmodium* lineages.

127         Here, we analyse the gene expression of *Cx. pipiens* infected with two  
128 widely distributed species of avian *Plasmodium* with different characteristics  
129 namely, *P. relictum* (lineage SGS1) and *P. cathemerium* (lineage PADOM02).  
130 To that end, we obtained RNA-seq data of mosquitoes infected with the two  
131 *Plasmodium* species at three time points corresponding with key stages of  
132 parasite development in the vector. These stages are (1) during the formation of  
133 ookinetes, (2) during the release of sporozoites into the hemocoel, and (3) after  
134 sporozoites invade and are stored in the salivary glands. This study uses a  
135 natural avian malaria system that will help to address the current knowledge  
136 gaps on molecular mechanisms occurring during *Plasmodium* infections in  
137 mosquitoes. In addition, these results will allow us to further understand the  
138 differences in virulence and transmissibility between these two *Plasmodium*  
139 species (Gutiérrez-López et al. 2020) and how this might affect vector  
140 competence.

141

## 142        **2. Results**

### 143        *Transcriptomics data description*

144        We obtained 36 mRNA-seq libraries: four replicates for three infection status  
145        at three time points. The mean number of reads per library was 33,177,082,  
146        ranging from 15,406,828 to 45,332,626 reads for raw samples. Raw data has  
147        been made publicly available through to the European Nucleotide Archive ENA  
148        database (<https://www.ebi.ac.uk/ena/browser/home>) under project accession  
149        number PRJEB1609, Study ERP125411. The percentage of reads kept after  
150        trimming ranged from 80.56% to 99.52%, (12,411,723 to 44,887,231 reads see  
151        Table S1). The MultiQC report showed a mean quality score above q30 in all  
152        base calls across the read. On average, 80.87% of reads mapped to the  
153        genome of *Cx. quinquefasciatus*. For downstream analyses, we removed two  
154        samples taken at 24 hpi that had barcoding errors due to lab processing.

### 155        *Sample clustering reveals early transcriptomic response to infection*

156        The principal component analysis (PCA) results show that most of the  
157        transcriptome variation is contained in the PC1 (85% var.) driven by the time  
158        post-infections, under both *Plasmodium* species infections. At 24 hpi, there  
159        were clear differences (PC2, 3% var.) between control samples, *P.*  
160        *cathemerium*, and *P. relictum* infected mosquitoes. By contrast, there were no  
161        clear transcriptomic differences at later stages, such as between 10 dpi and at  
162        21 dpi, nor between infection statuses (Figure 1).

163

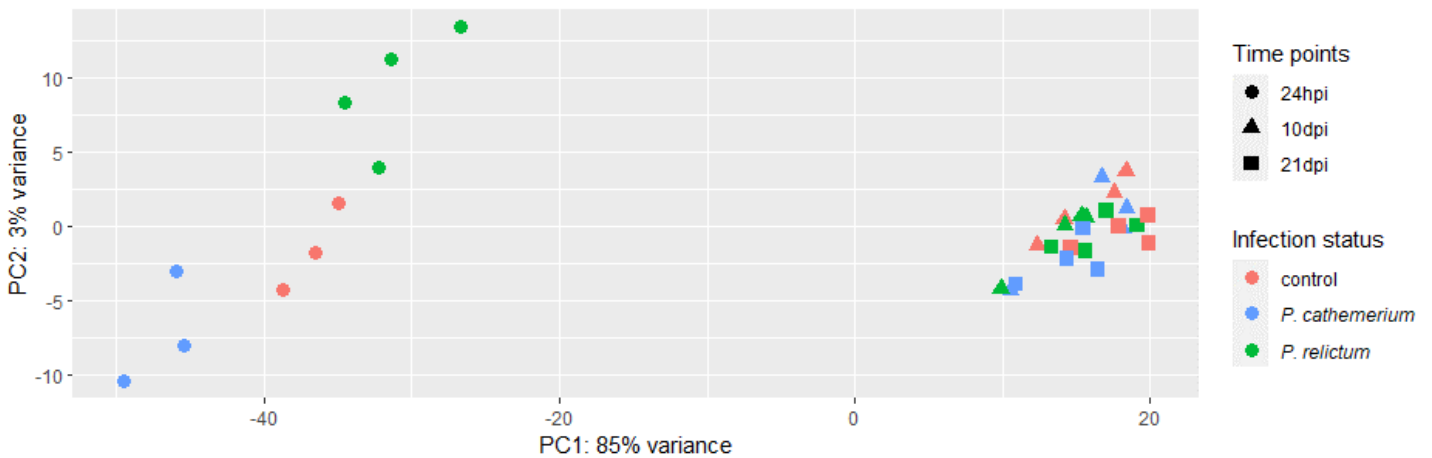

164 **Figure 1.** Principal component analysis (PCA) of transcriptome variation in *Cx.*  
165 *pipiens* at three time points after feeding on either an uninfected bird (control), a  
166 *P. cathemerium*-infected bird and a *P. relictum*-infected bird. Time points  
167 analysed were 24 hours post-infection (hpi), 10 days post-infection (dpi) and 21  
168 dpi. The x-axis shows the first principal component score, which captures 84%  
169 of variation and the y-axis shows the second principal component score, which  
170 captures 3% of variation.

171

172 *Differential gene expression analysis and enrichment analysis unveil the clues*  
173 *of the mosquito transcriptomic response to Plasmodium infections*

174 Overall, 2,038 genes were differentially expressed in *Cx. pipiens*. Most of  
175 the transcriptomic differences were found at an early infection stage (24 hpi),  
176 especially when comparing *P. relictum*-infected mosquitoes vs *P. cathemerium*-  
177 infected mosquitoes, and *P. relictum*-infected mosquitoes vs controls. No  
178 differences were found between mosquitoes infected by *P. cathemerium* and  
179 those infected by *P. relictum* at 10 dpi and between mosquitoes infected with *P.*  
180 *relictum* and controls at 21 dpi. At 24 hpi, the comparisons *P. relictum*-infected  
181 mosquitoes vs controls and *P. relictum* vs *P. cathemerium*-infected mosquitoes  
182 shared 460 differentially expressed genes (Figure 2).



183

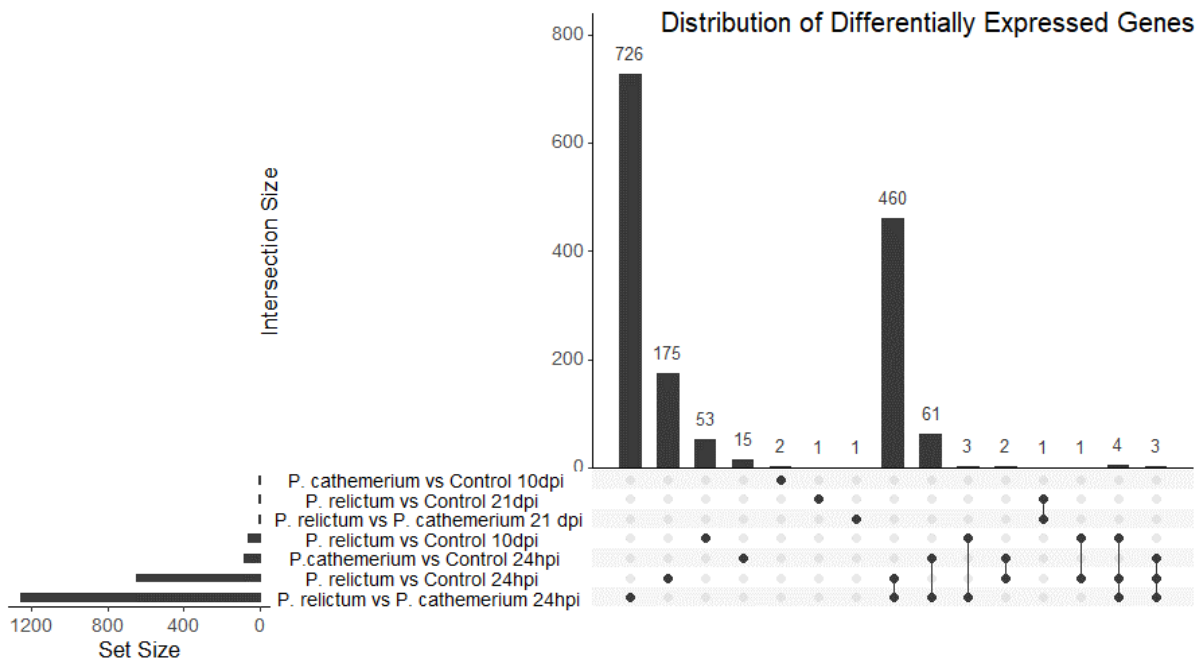

184

185 **Figure 2.** UpSet plot showing overlap size of sets of differentially expressed  
 186 genes for i) *P. cathemerium* infected mosquitoes vs controls, ii) *P. relictum*  
 187 *infected* mosquitoes vs controls, and iii) *P. relictum* infected mosquitoes vs *P.*  
 188 *cathemerium* infected mosquitoes at three time points (24 hpi, 10 dpi and 21 dpi).  
 189 The top vertical bar plot shows the number of genes (y-axis) contained in each  
 190 intersection (x-axis). The horizontal bar plot at the bottom shows the number of  
 differentially expressed genes for each comparison.

191

192

a) *Cx. pipiens* gene expression response to *P. relictum* infection

193

194

195

196

197

198

199

200

At 24 hpi, *P. relictum*-infected *Cx. pipiens* had 638 genes differentially expressed when compared to the controls (Figure S1A). Exposition to *P. relictum* triggered the expression of 106 genes, including a cecropin gene (CPIJ005108), the *spätzle* gene (CPIJ006792) and a mitochondrial NADH-ubiquinone oxidoreductase gene (CPIJ009076). The 532 downregulated genes included an apoptosis inhibitor (CPIJ004812), one trypsin (CPIJ007075), chymotrypsins (e.g. CPIJ003915, CPIJ018205, CPIJ007838 and CPIJ006568) and serine proteases genes (CPIJ004984 and CPIJ002112).

201           At 10 dpi, 54 genes had higher expression levels and 15 genes had  
202 lower expression levels in infected mosquitoes compared to controls (Figure  
203 S1B). At 21 dpi, a single gene corresponding to an uncharacterized protein was  
204 up-regulated, and a testicular acid phosphatase precursor gene was down-  
205 regulated.

206           At 24 hpi, the GO categories within biological processes related to  
207 cellular mechanisms and mitochondrial chain complex assemblies presented  
208 the greatest number of up-regulated genes. Within down-regulated genes, the  
209 enriched biological processes included molecules binding, metabolism,  
210 transport and location (Figure 3). The molecular functions enriched for up-  
211 regulated genes were cation binding, metal ion binding and ion binding.  
212 Protein, ATP, and nucleic acids binding molecular functions (including purine  
213 ribonucleoside triphosphate, purine nucleotide, purine ribonucleotide, adenylyl  
214 nucleotide and adenylyl ribonucleotide, among others) were enriched for down-  
215 regulated genes (Figure 4).

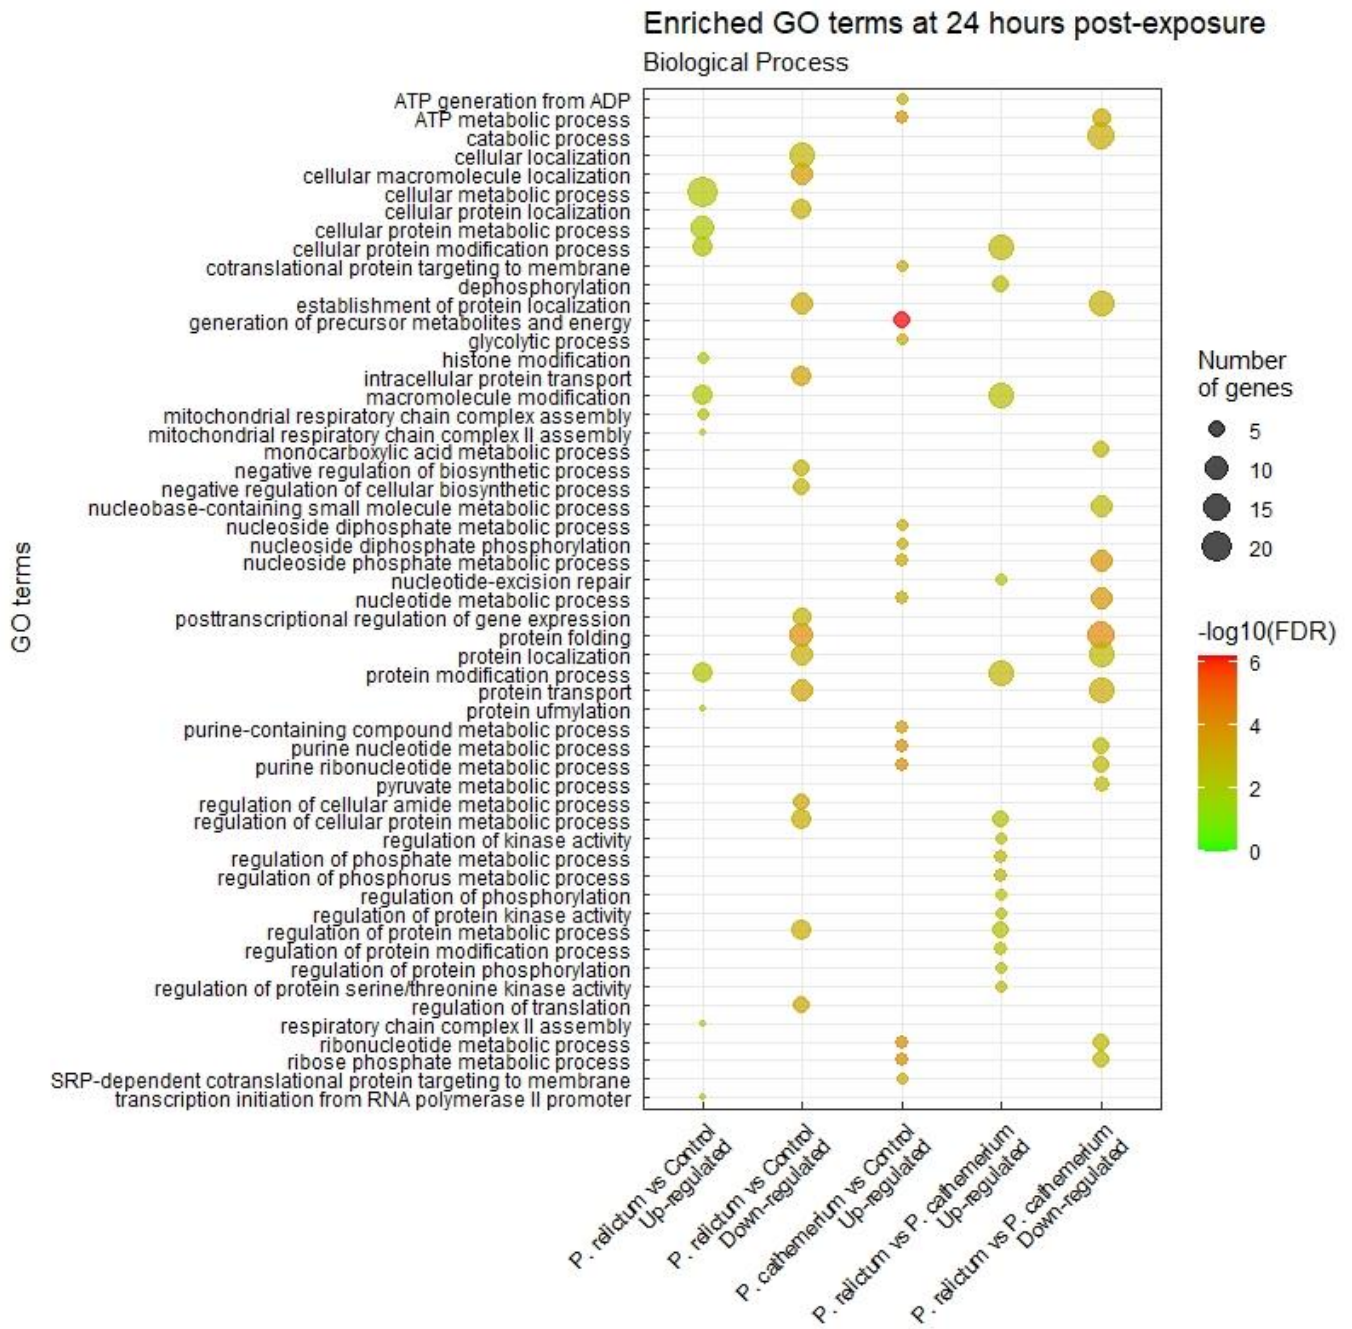

216

217

218 **Figure 3.** Dot plot of significantly (FDR adjusted p-value <0.01) enriched GO  
 219 biological processes for differentially expressed genes (up and down-regulated)  
 220 at 24 hpi for i) *P. cathemerium* infected mosquitoes vs controls, ii) *P. relictum*  
 221 infected mosquitoes vs controls, and iii) *P. relictum* infected mosquitoes vs *P.*  
 222 *cathemerium* infected mosquitoes. We did not find enriched GO terms for down-  
 223 regulated genes for *P. cathemerium* infected mosquitoes vs controls. Larger dots  
 224 correspond to a higher number of significant genes, and the color gradient goes  
 from green for the least significant terms to red for the most significant terms.

225

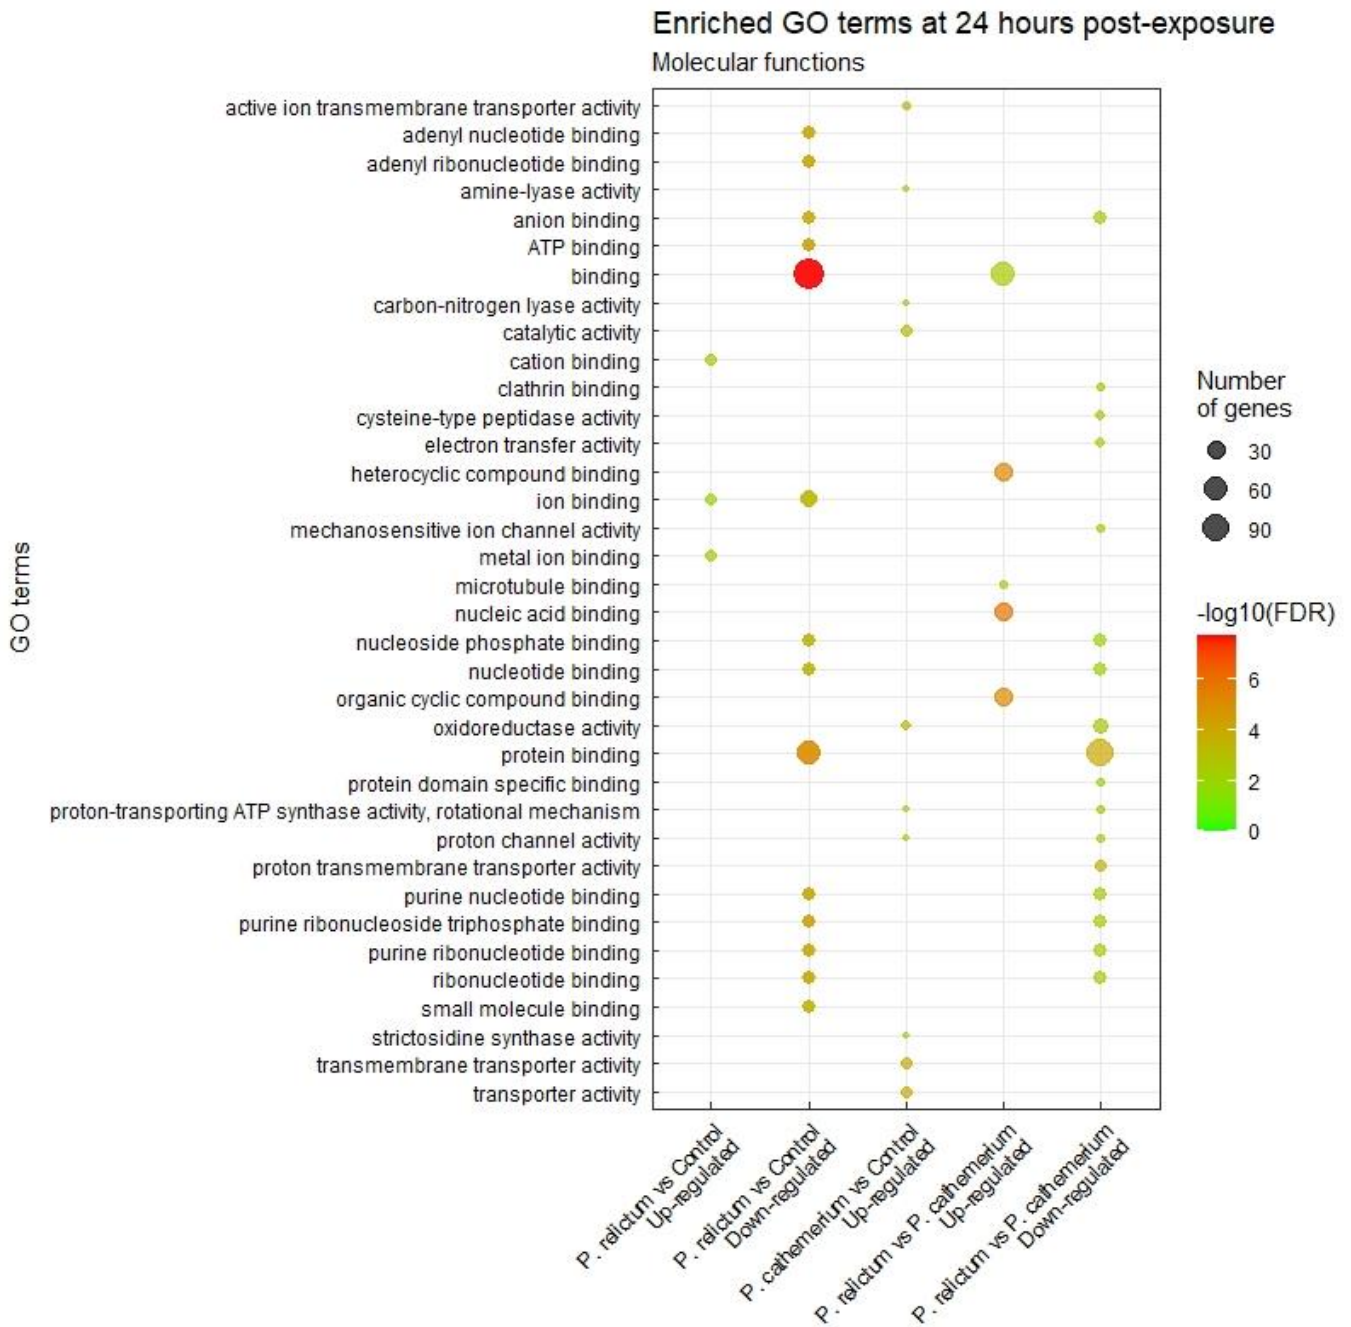

227 **Figure 4.** Dot plot of significantly (FDR adjusted p-value <0.01) enriched GO  
 228 molecular functions for differentially expressed genes (up and down-regulated)  
 229 at 24 hpi for i) *P. cathemerium* infected mosquitoes vs controls, ii) *P. relictum*  
 230 infected mosquitoes vs controls, and iii) *P. relictum* infected mosquitoes vs *P.*  
 231 *cathemerium* infected mosquitoes. We did not find enriched GO terms for down-  
 regulated genes for *P. cathemerium* infected mosquitoes vs controls.

232

233 At 10 dpi enriched biological processes were related to amino acid

234 biosynthesis for up-regulated genes and to protein geranylation for the

235 down-regulated genes (Figure S2). Molecular functions included actin  
236 monomer binding and GTPase activity for up-regulated genes and DNA  
237 binding for down-regulated genes (Figure S3).

238

239

b) *Cx. pipiens* gene expression during response to *P. cathemerium* infection

240 In *P. cathemerium* infected mosquitoes, 79 genes had a significant  
241 differential expression, 76 genes were up-regulated and 3 down-regulated,  
242 when compared with the control group at 24 hpi (Figure S4). Among the up-  
243 regulated genes with a greater log fold change there were genes related to  
244 digestive enzymes like *trypsin 2 precursor* (CPIJ005273), two protein G12  
245 precursors (CPIJ012846 and CPIJ012848), and a GRIM19 gene (CPIJ009571),  
246 which product is a cell death-regulatory protein. Several genes related to the  
247 mitochondrial electron chain were also up-regulated, including a ADP-ATP  
248 carrier protein (CPIJ005941), several ATP synthase subunits (e.g. CPIJ018457,  
249 CPIJ005682, CPIJ005682 and CPIJ018208), and a NADH-ubiquinone  
250 oxidoreductase (CPIJ009280). The gen *pom1* gen (CPIJ019938) was down-  
251 regulated. At 10 dpi only one gene had differential gene expression and was up-  
252 regulated but was uncharacterized. There was no differential gene expression  
253 at 21 dpi.

254 Enriched terms were found only for up-regulated genes at 24 hpi. GO  
255 terms associated with biological processes were mostly related to the  
256 generation of precursor metabolites and energy, ATP generation, and nucleic  
257 acids metabolic processes, including nucleoside phosphate, ribose phosphate,  
258 nucleotide, ribonucleotide, purine nucleotide and purine ribonucleotide  
259 metabolic processes (Figure 3). GO terms associated with molecular functions

260 included ion and transmembrane transporter, oxidoreductase and proton-  
261 transporting ATP synthase activities (Figure 4).

262

263

264

c) *Cx. pipiens* respond differently to *P. relictum* and *P. cathemerium*  
infections

265

266

267

268

269

270

271

272

273

274

275

276

277

At 24 hpi 1,247 genes were found to be differentially expressed in *P. relictum* and *P. cathemerium* infected mosquitoes (Figure S5). Mosquitoes infected with *P. relictum* shown 327 up-regulated and 920 down-regulated genes compared to mosquitoes infected with *P. cathemerium*. Mosquitoes infected by *P. relictum* compared to those infected by *P. cathemerium* showed down-regulated genes related to four protein G12 precursors (CPIJ012848, CPIJ012844, CPIJ012845, and CPIJ012846), two chitin synthases (CPIJ014268 and CPIJ014269), a peritrophic membrane chitin binding protein (CPIJ007042) and a number of serine proteases including four chymotrypsin precursors (CPIJ003915, CPIJ018205, CPIJ007838 and CPIJ006568), three trypsin precursors (CPIJ005273, CPIJ006019, and CPIJ004660) and one maltase precursor (CPIJ013170), among others. No differentially expressed genes were found at 10 dpi and only 2 genes at 21 dpi.

278

279

280

281

282

At 24 hpi, biological processes related to metabolic regulation were enriched for up-regulated genes, while down-regulated genes included nucleic acid nucleotide metabolic processes (Figure 3). Molecular function transporter activities and microtubule binding were enriched in up-regulated genes in mosquitoes infected by *P. relictum* compared to those infected by *P.*

283 *cathemerium*. Most down-regulated enriched molecular functions were related  
284 to protein and nucleotides binding (Figure 4).

### 285 **3. Discussion**

286 How mosquitoes respond to infection and the impact of such infection will  
287 ultimately influence the transmission of different *Plasmodium* species. For  
288 example, *P. relictum* and *P. cathemerium* infections in *Cx. pipiens* have a  
289 different impact on the mosquitoes' fitness. In particular, *P. relictum* causes  
290 higher mortality than *P. cathemerium* infections in *Cx. pipiens*, and the  
291 transmissibility of *P. relictum* is lower than that of *P. cathemerium* (Gutiérrez-  
292 López et al. 2020). But little is known about the genetic underpinnings of  
293 mosquito response to Plasmodium infections. Here, we compare the  
294 transcriptional response of *Cx. pipiens* infected by these two avian *Plasmodium*  
295 species. Our results show that although responses of infected *Cx. pipiens* by  
296 these *Plasmodium* species share some common pathways, there are key  
297 differences in gene expression associated with the immune system, serine-  
298 protease synthesis, and nucleic acid metabolism that may explain the  
299 differences found in virulence and transmission.

#### 300 *Early and different response to the infection*

301 When a mosquito feeds on a vertebrate host, a number of processes  
302 involving changes in gene expression are triggered (Dana et al. 2005). We  
303 found that the vast majority of the differentially expressed genes between  
304 infected and uninfected mosquitoes were found at 24 hpi. Between 18-24 h  
305 after blood feeding ookinetes form, invade the peritrophic matrix leaving behind  
306 the blood bolus and start the midgut epithelium cell invasion (Cirimotich et al.  
307 2010; Valkiūnas et al. 2015; Baia-da-Silva et al. 2018). Ookinete formation and

308 invasion of the midgut epithelium are considered critical steps that will  
309 determine the success of the infection. Parasite abundance drops drastically  
310 during this step due to luminal and epithelial immune responses mounted by  
311 the mosquito (Cirimotich et al. 2010), which may explain the significant  
312 differences in gene expression between uninfected and infected mosquitoes at  
313 24 hpi (Ferreira et al. 2022). In addition, Vlachou et al. (2005) using the *P.*  
314 *berghei* - *Anopheles gambiae* model found that 7% of the mosquito  
315 transcriptome was differentially regulated during ookinete invasion of the  
316 midgut.

317         At 24 hpi, for both mosquitoes infected with *P. cathemerium* and *P.*  
318 *relictum*, we found an increase in differentially expressed genes and enriched  
319 GO terms related with the mitochondrial respiratory chain activity that ultimately  
320 produces reactive oxygen species (ROS) (Kowaltowski et al. 2009). Small  
321 regulatory changes in the mitochondrial respiratory chain can drastically affect  
322 ROS generation (Korshunov et al. 1997; Kowaltowski et al. 2009). For example,  
323 *Anopheles stephensi* and *An. gambiae* increased the levels of ROS in response  
324 to *Plasmodium* infection (Han 2000; Kumar et al. 2003), and higher levels of  
325 ROS improve mosquito survival after a bacterial infection (Molina-Cruz et al.  
326 2008). At 24 hpi we also found most of the differences in gene expression  
327 between mosquitoes infected by each of these parasites.

328

329

330



331 *Differential immune response between mosquitoes exposed to P. relictum or P.*  
332 *cathemerium*

333 We found important differences in the expression of genes associated  
334 with the immune response between *P. relictum*- and *P. cathemerium*-infected  
335 mosquitoes. At 24 hpi in *Cx. pipiens* infected by *P. cathemerium*, we found that  
336 two of the most up-regulated genes were protein G12 precursors. G12  
337 transcripts accumulate in the midgut of mosquitoes after blood feeding (Shao et  
338 al. 2005; Bonizzoni et al. 2012), and may aid in erythrocyte digestion given their  
339 hemolytic activity (Foo et al. 2020). G12 transcripts have been suggested to  
340 play a role in immune function because: i) G12 protein in *Ae. Aegypti* has a high  
341 level of identity with cockroach allergens (Morlais et al. 2003), ii) it is up-  
342 regulated after flavivirus infection via the JAK-STAT pathway (Etebari et al.  
343 2017), and iii) it has a cytolytic effect on flaviviruses and several types of  
344 eukaryotic cells (Foo et al. 2020). In fact, a G12 protein gene was found up-  
345 regulated in *Ae. aegypti* 12 hours after feeding on blood infected with  
346 *Plasmodium gallinaceum* (Morlais et al. 2003), suggesting a potential role in the  
347 immune response against these parasites as well.

348 When compared to the controls, mosquitoes exposed to *P. cathemerium*  
349 also had up-regulation of a GRIM19 gene. The cell death-regulatory protein  
350 GRIM19 is a well-known subunit protein of the mitochondrial complex I that acts  
351 as a tumor suppressor in humans and is highly conserved in eukaryotes,  
352 including insects (Nallar and Kalvakolanu 2017). The GRIM19 protein is  
353 involved in the innate immune response producing proinflammatory cytokines  
354 (Chen et al. 2012), which act controlling the growth of parasites and their  
355 elimination. An enrichment of GRIM19 sequence was found in *Ae. aegypti* and

356 *Armigeres subalbatus* mosquitoes exposed to pathogenic bacteria

357 (Bartholomay et al. 2004).

358 In *P. relictum*-infected mosquitoes several of the up-regulated genes at  
359 24 hpi were also related to the innate immune response when compared to the  
360 controls. Some of these genes included the Spätzle and Cecropin N proteins. In  
361 insects, when a pathogen is recognized, the extracellular Spätzle cytokine  
362 activates the Toll receptors, which regulate the antimicrobial peptides (AMPs),  
363 an essential innate immune response (De Gregorio 2002; Shia et al. 2009). The  
364 AMPs eventually kill pathogens by a number of strategies including disrupting  
365 the microbial membrane (Shen et al. 2018). Spätzle protein activates a Toll  
366 receptor in *Ae. aegypti* mosquitoes when infected with the fungus *Beauveria*  
367 *bassiana* (Shin et al. 2006) and in other insects after bacterial and fungal  
368 exposure (Bae et al. 2021). Cecropins are one of the largest groups of insect  
369 AMPs found in the orders Diptera, Lepidoptera, and Coleoptera among others  
370 (Vizioli et al. 2000; An et al. 2009; Memarpour-Yazdi et al. 2013). The activation  
371 of the Toll pathway (Frolet et al. 2006) and specifically cecropin-analogs may kill  
372 *Plasmodium* parasites (Jaynes et al. 1988) and disrupt sporogonic development  
373 by aborting the normal development of oocysts (Gwadz et al. 1989; Kim et al.  
374 2004). Our results showing the role of the Toll pathway are consistent with a  
375 recent study addressing the effect of *P. relictum* (lineage SGS1) on the immune  
376 system of *Cx. quinquefasciatus* (García-Longoria et al. 2022). They found that  
377 over 50% of immune genes identified as being part of the Toll pathway in *Cx.*  
378 *quinquefasciatus* were up-regulated after exposure to *P. relictum*.

379

380

381 *Differential expression of genes associated with trypsin and serine metabolism*

382 Serine proteases have several functions in insects including blood  
383 digestion (Borovsky and Schlein, 1988) and mediation in the immune response  
384 (melanization, cytokine activation, and antimicrobial peptides; Jiang et al. 2010).  
385 Trypsins and chymotrypsins, two types of serine proteases, are two essential  
386 digestive enzymes in mosquitoes (Molina-Cruz et al. 2005; Borges-Veloso et al.  
387 2012). The synthesis of trypsin and chymotrypsin is triggered after mosquito  
388 blood feeding to digest the chitin-containing peritrophic matrix (Vizioli et al.  
389 2001; Muller et al. 1995) which is fully formed at 24 h post feeding (Hegedus et  
390 al. 2009). However, the production of trypsin and chymotrypsin may be down or  
391 up-regulated by the infection with different parasites (Borovsky and Schlein  
392 1987; Shahabuddin et al. 1996; Serrano-Pinto et al. 2010). Mosquito trypsin  
393 may be a signal for *Plasmodium* ookinetes to cross the peritrophic matrix at the  
394 right time for proper *Plasmodium* development (Shahabuddin et al. 1996). In  
395 particular, mosquito trypsin proteases play a fundamental role in allowing *P.*  
396 *gallinaceum* to cross the peritrophic matrix by activating a *Plasmodium*  
397 prochitinase enzyme (Shahabuddin et al. 1996). In fact, trypsin inhibitors block  
398 the development of *Plasmodium* oocysts (Shahabuddin et al. 1996), suggesting  
399 that mosquito trypsin is a key molecule for pathogen infection.

400 Mosquitoes exposed to *P. cathemerium* up-regulated genes associated  
401 with trypsin and serine metabolism, while mosquitoes exposed to *P. relictum*  
402 down-regulated genes from the same family. Furthermore, when comparing  
403 gene expression between mosquitoes exposed to each species, we found  
404 several trypsin and chymotrypsin precursors down-regulated in mosquitoes  
405 exposed to *P. relictum*. This differential expression was found at 24 hpi,

406 therefore coinciding with the moment when the peritrophic matrix is fully formed  
407 and the ookinetes are crossing it. Agreeing with the findings of Shahabuddin et  
408 al. (1996) for the infection by *P. gallinaceum*, we also found that trypsin (*trypsin*  
409 *2 precursor*, CPIJ005273) was up-regulated in mosquitoes infected with *P.*  
410 *cathemerium* when compared with uninfected mosquitoes. This suggests the  
411 potential role of the trypsin proteases to allow *P. cathemerium* to cross the  
412 peritrophic matrix. In contrast, mosquitoes infected with *P. relictum* had a  
413 number of down-regulated genes characterized as serine proteases, including  
414 several chymotrypsin and one trypsin. Ferreira et al. (2022) also found serine-  
415 type endopeptidase activity enriched for down-regulated genes when studying  
416 the expression of *Cx. quinquefasciatus* infected by *P. relictum*. We hypothesize  
417 that the lower levels of trypsin in response to *P. relictum* infection might lead to  
418 a lower number of oocysts and would explain why the transmissibility of *P.*  
419 *relictum* is lower than that of *P. cathemerium* (Gutiérrez-López et al. 2020).

420 In addition, an under-expression of serine-proteases related to blood  
421 digestion such as chymotrypsins should partly block the digestion of the blood,  
422 which is very rich in proteins (Kumar et al. 2017). This would make it difficult to  
423 obtain nutrients needed for various processes like egg formation and could lead  
424 to digestive dysregulation in the mosquito which might increase mortality. Here  
425 mosquitoes seem to be down-regulating important processes due to the  
426 infection with *P. relictum* which might have a cost for the mosquito, induce  
427 damage and decrease the tolerance to infection.

428

429

430 *Differential expression of genes with nucleic acids metabolism activity and*  
431 *binding function*

432 At 24 hpi, GO biological processes related to nucleic acids metabolism  
433 were enriched for up-regulated genes in mosquitoes infected with *P.*  
434 *cathemerium* compared to controls. At the same time point, molecular functions  
435 related to nucleic acids binding were enriched for down-regulated genes in both  
436 mosquitoes infected with *P. relictum* vs controls and mosquitoes infected with *P.*  
437 *relictum* vs *P. cathemerium*. When a mosquito is infected by a pathogen after a  
438 blood meal, the gut epithelium suffers cellular damage (Nászai et al. 2015) and  
439 a group of specialized cells regenerates these epithelium cells (Taracena et al.  
440 2018; Janeh et al. 2019). After a *Plasmodium* infection, the regeneration of the  
441 midgut cells would require the up-regulation of the nucleic acid metabolism to  
442 synthesize the genetic material, as we observed in *Cx. pipiens* after *P.*  
443 *cathemerium* infection. On the other hand, mosquitoes infected with *P. relictum*  
444 under-expressed molecular functions related to nucleic acids binding, which  
445 may hinder the regeneration of the mosquito's damaged cells, reducing its  
446 tolerance to infection. This is consistent with reduced survival of *Cx. pipiens*  
447 infected with *P. relictum* compared to those infected with *P. cathemerium*  
448 observed by Gutiérrez-López et al. (2020).

449

450 *Reduced differential gene expression at 10 and 21 days post-infection*

451 An unexpected result was the strong decrease of differential gene  
452 expression between infected and uninfected mosquitoes at 10 dpi. We chose  
453 this time point because at about 10 dpi *Plasmodium* mature oocysts release the

454 sporozoites into the mosquito hemocoel (Cirimotich et al. 2010). However, at  
455 this time point, only *P. relictum*-infected mosquitoes compared to controls  
456 showed differences in gene expression and the number of differentially  
457 expressed genes decreased significantly compared to 24 hpi. Similar results  
458 were obtained by Ferreira et al. (2022) when studying gene expression of *Cx.*  
459 *quinquefasciatus* exposed to *P. relictum*. In addition, the absence of differential  
460 expression in mosquitoes exposed to *P. relictum* compared to those exposed to  
461 *P. cathemerium* may be due to differences in the developmental time of  
462 different species of *Plasmodium* (Sinden 1983). *P. cathemerium* produces  
463 sporozoites faster than *P. relictum* when infecting *Cx. pipiens* mosquitoes  
464 (Kazlauskienė et al. 2013; Aly et al. 2020), and therefore they may not be  
465 exactly at the same point of development within the mosquito at 10 dpi.

466 By 21 dpi, the differences in gene expression were drastically reduced. With  
467 only two genes differentially expressed in mosquitoes infected with *P. relictum*,  
468 and none in those infected with *P. cathemerium*. This decrease in differential  
469 expression towards the end of the infection has been found before in *Cx.*  
470 *quinquefasciatus* infected with *P. relictum* (Ferreira et al. 2022, García-  
471 Longoria et al. 2022). Although the causes behind this decrease are not clear,  
472 we hypothesize that the response towards the end of the infection might be  
473 localized to the salivary glands, and by analysing whole mosquitoes we are  
474 diluting any potential effect.

#### 475 *Comparisons across avian malaria studies*

476 Although studies analysing the response of mosquitoes to avian malaria  
477 are still scarce we can already see some common patterns and differences.  
478 Two other recent studies have analysed the response to *P. relictum* infection in

479 *Cx. quinquefasciatus*, a species closely related to *Cx. pipiens*. A common  
480 pattern found in all studies is the progressive reduction in the differential gene  
481 expression at 10 and 21 dpi with respect to 24 hpi. In addition, like García-  
482 Longoria et al. (2022), we found the activation of the Toll-like receptor pathway  
483 in response to *P. relictum* SGS1 infection. Interestingly, Ferreira et al. (2022)  
484 did not find this pattern. Although different factors may be influencing this result,  
485 like experimental procedures or the genetic differences between the populations  
486 of *Cx. quinquefasciatus* used, one of the main factors might have been the  
487 lineage used for the infection. Ferreira et al. (2022) infected the mosquitoes with  
488 another lineage, *P. relictum* GRW4, which dominates in America. Like Ferreira  
489 et al. (2022), the response to infection we found for mosquitoes infected with *P.*  
490 *cathemerium*, was different. But, a similar pattern has been found before.  
491 Shahabuddin et al. (1996) reported the important role of a mosquito trypsin in  
492 the passage of *P. gallinaceum* through the peritrophic matrix, as our results  
493 indicate for *P. cathemerium*. Altogether these result suggests that different  
494 *Plasmodium* species or lineages may trigger a differential immune response in  
495 mosquitoes.

#### 496 *Concluding remarks*

497       Because we used naturally infected wild birds as *P. cathemerium* and *P.*  
498 *relictum* donors and wild collected mosquitoes, the results obtained here  
499 represent a good example of a natural system. In this respect, we found a  
500 different transcriptomic response to infections, especially at 24 hpi. This time  
501 point coincides with one of the key stages of *Plasmodium* development in  
502 mosquitos, when the ookinetes form, cross the peritrophic matrix and start to  
503 invade the midgut epithelium. Although both elicit an innate immune response,

504 the response seems to be stronger in mosquitoes exposed to *P. relictum* with  
505 the activation of the Spätzle and Cecropin N proteins which result in a reduction  
506 in the number of oocysts in the mosquito midgut. In addition, the lower levels of  
507 trypsin in mosquitoes exposed to *P. relictum* may also affect the parasite  
508 development within the mosquito, which may affect parasite transmission  
509 (Gutiérrez-López et al. 2020). If the cost of this response is high, this can also  
510 potentially lead to higher mosquito mortality. In particular, the proteases and  
511 trypsin are necessary to digest the blood meal, and if levels are too low this  
512 might increase mosquito mortality. Future studies are necessary to understand  
513 how these differences may be related to the different ecology and incidence of  
514 *Plasmodium* lineages/species in the wild.

#### 515 **4. Material and Methods**

516

##### 517 *Sampling and experimental conditions*

518 We captured juvenile house sparrows (*Passer domesticus*) with mist nets  
519 in September 2020 at Granja Escuela de Trigueros (Huelva province, Spain).  
520 We ringed, weighted and measured the individuals before bringing them into  
521 captivity at the animal facilities of the Doñana Biological Station, following the  
522 ethical guidelines (article 34 RD 53/2013).

523 In the field, we took blood samples from each bird jugular vein using a  
524 sterile syringe. Blood samples were used to molecularly identify the blood  
525 parasite infections and the parasite lineage identity. To do that, we extracted  
526 genomic DNA from blood samples using a Lithium Chloride protocol (Gemell  
527 and Akiyama 1996) and detected parasite infections following Hellgren et al.  
528 (2004). We sequenced the amplified products for positive samples on both



529 strands using Capillary Electrophoresis Sequencing by MacroGen (Madrid,  
530 Spain). We analysed the sequences using Geneious v. 2020.0.3 (Kearse et al.  
531 2012) and identified lineages in MalAvi  
532 (<http://130.235.244.92/Malavi/blast.html>). After molecular analyses, we chose  
533 three birds for further analyses, namely: A bird that was not infected by  
534 *Plasmodium*, *Haemoproteus* nor *Leucocytozoon* (control), a bird infected with *P.*  
535 *relictum* lineage SGS1, and a bird infected with *P. cathemerium* lineage  
536 PADOM02.

537 We collected mosquito larvae on October 2020 in Aljaraque (Huelva  
538 province) and reared them following Gutiérrez-López et al. (2020). We  
539 maintained larvae in dechlorinated water and fed *ad libitum* with Hobby-  
540 Mikrozell 20 ml/22 g (Dohse Aquaristik GmbH & Co.101 KG, D-53501, Gelsdorf,  
541 Germany) and Hobby-Liquizell 50 ml (Dohse Aquaristik GmbH & Co.101 KG, D-  
542 53501, Gelsdorf, Germany). After emergence, we identified adults to the  
543 species level and sexed them following Gunay et al. (2018). We kept adult *Cx.*  
544 *pipiens* females in separate cages of 50 individuals maximum and fed them with  
545 a 10% sugar solution. We maintained both larvae and adult mosquitoes under  
546 controlled conditions (26°C ± 1, 55-60% relative humidity (RH) and 12:12  
547 light:dark photoperiod cycle).

548 We divided the 11-day-old adults (± 1 day) into 3 groups mixing  
549 individuals originating from the different cages and allowed them to feed  
550 overnight on a *P. relictum*-infected bird, a *P. cathemerium*-infected bird and an  
551 uninfected control bird. Only one individual of each category was used in this  
552 experiment and they were exposed to mosquitoes only one time. In the morning

553 after exposure, we separated the fed females of each group into three different  
554 cages and maintained them under the conditions described above.

555 For transcriptome analyses, we processed mosquitoes at three time  
556 points after exposure (24 hpi, 10 dpi and 21 dpi). At each time point, we created  
557 pools of 5 mosquitoes of each infection status capturing the mosquitoes alive  
558 and immediately transferring them to dry ice. We preserved the mosquitoes at -  
559 80C until RNA extractions were carried out. We collected a total of 36 samples  
560 including controls (4 pools x 3 time-points x 3 conditions).

#### 561 *RNA extraction, library preparation, and sequencing*

562 We extracted RNA and DNA from pools of 5 mosquitoes using TRIzol®  
563 (Invitrogen, Carlsbad, CA, USA) followed by column purification using RNeasy  
564 mini kit® (QIAGEN, Hilden, Germany) following Ferreira et al. (2022). We tested  
565 the remaining DNA for the presence of *Plasmodium* following Hellgreen et al.  
566 (2004) confirming that parasite DNA was present in all positive samples and not  
567 present in negative samples. We prepared RNAseq libraries at the Polo  
568 d'Innovazione di Genomica, Genetica e Biologia, Siena (Italy) using and  
569 Illumina library. Then, we quantified samples using Qubit® 4.0 Fluorometer and  
570 checked RNA integrity using the Fragment Analyzer to measure RNA Quality  
571 Number (RQN) specific for mosquitoes. Finally, we prepared the libraries  
572 following the QIAseq™ Stranded mRNA Selected Kit Handbook for Illumina  
573 Paired-End Indexed Sequencing. Indexed DNA libraries were sequenced in an  
574 Illumina NextSeq550 Flowcell, using the Illumina chemistry V2.5, 2x75bp run.

575

576

577

578 *Data analysis*  
579

580 To check the quality of the reads we used FastQC (ver. 0.11.9; Andrews  
581 et al. 2010) and MultiQC (Ewels et al. 2016). Then, we filtered low quality and  
582 under 36 bp reads using Trimmomatic (Bolger et al. 2014). Since the reference  
583 genome and annotations of *Cx. pipiens* are not published yet, we used the  
584 reference genome and annotations of phylogenetically closest species that  
585 were available in Ensembl, *Cx. quinquefasciatus*  
586 ([https://metazoa.ensembl.org/Culex\\_quinquefasciatus/Info/Index](https://metazoa.ensembl.org/Culex_quinquefasciatus/Info/Index)). We used  
587 STAR (Dobin et al. 2012) to map the short reads to the reference genome of  
588 *Cx. quinquefasciatus* and RSEM (Li and Dewey 2011) to quantify gene  
589 abundances.

590 Following steps were carried out in R (R Core Team 2021) using  
591 Bioconductor packages (Huber et al. 2015). We carried out a Variance  
592 Stabilizing Transformation (VST) of the counts to represent the samples on a  
593 PCA plot. Then, we used the DESeq2 package (Love et al. 2014) to perform the  
594 differential gene expression analysis comparing: i) *P. cathemerium* infected  
595 mosquitoes vs controls, ii) *P. relictum* infected mosquitoes vs controls, and iii)  
596 *P. relictum* infected mosquitoes vs *P. cathemerium* infected mosquitoes. We  
597 kept those genes with an adjusted p-value < 0.01 and sorted them by the log<sub>2</sub>  
598 fold change estimations to consider the strength of up- and down-regulation.  
599 We finished the differential gene expression analysis visualizing differentially  
600 expressed genes by MA plots and an UpSet plot.

601 Finally, we performed a Gene Ontology (GO) enrichment analysis for the  
602 up- and down-regulated genes using the topGO package (Alexa and

603 Rahmenfuhrer 2010) including the “biological processes” and “molecular  
604 functions” categories from VectorBase (Giraldo-Calderón et al. 2015). For the  
605 Enrichment analysis we used classical algorithm and Fisher’s exact test and  
606 considered enriched the GO terms with p-value < 0,01. We used the ggplot2  
607 (Wickham 2016) package to visualize the enriched GO terms as described by  
608 Bonnot et al. (2019).

## 609 **5. Data Access**

610 Raw sequences generated in this study have been submitted to the European  
611 Nucleotide Archive ENA database (<https://www.ebi.ac.uk/ena/browser/home>)  
612 under project accession number PRJEB1609, Study ERP125411.

## 613 **6. Acknowledgments**

614 We thank Francisco Ferreira for his help optimizing the RNA extraction  
615 protocol, Juan Pascual, and Alazne Diez for their help during the experiments,  
616 and Cristina Pérez for her help with the laboratory work. This publication was  
617 supported by the project Research Infrastructures for the control of vector-borne  
618 diseases (Infravec2), which has received funding from the European Union’s  
619 Horizon 2020 research and innovation program, under grant agreement No  
620 6738; project PGC2018-095704-B-I00 from Agencia Española de Investigación  
621 supported by FEDER Funds from the European Union and the computing  
622 infrastructure provided by ICTS-RBD-CSIC. This study was also partially  
623 financed by the PID2020-118205GB-I00 grant funded by MCIN/AEI/  
624 10.13039/501100011033 and by “ERDF A way of making Europe”. MG was  
625 supported by a FPI grant (PRE2021-098544). GY contributions were supported  
626 by the Faculty of Biochemistry, Biophysics and Biotechnology at Jagiellonian  
627 University (Poland), under the Strategic Programme Excellence Initiative.

628        **7. References**

629

630    - Abraham E, Jacobs-Lorena M. 2004. Mosquito midgut barriers to malaria  
631    parasite development. *Insect Biochem. Mol Biol* **34**(7): 667-671.

632    - Ahmed AM, Baggott SL, Maingon R, Hurd H. 2002. The costs of mounting an  
633    immune response are reflected in the reproductive fitness of the mosquito  
634    *Anopheles gambiae*. *Oikos (Copenhagen, Denmark)*, **97**(3): 371-377.

635    <https://doi.org/10.1034/j.1600-0706.2002.970307.x>

636    - Alexa A, Rahnenfuhrer J. 2010. topGO: enrichment analysis for gene  
637    ontology. R package version, **2**(0), 2010.

638    - Aly MZY, Mohamed III, Sebak SI, Vanstreels RET, El Gendy AM. 2020.  
639    Morphological and molecular characterization of *Plasmodium cathemerium*  
640    (lineage PADOM02) from the sparrow *Passer domesticus* with complete  
641    sporogony in *Culex pipiens* complex. *Parasitology* **147**(9): 985-993.

642    <https://doi.org/10.1017/S0031182020000566>

643    - An C, Jiang H, Kanost M. 2009. Proteolytic activation and function of the  
644    cytokine Spätzle in the innate immune response of a lepidopteran insect,  
645    *Manduca sexta*. *FEBS J* **277**(1): 148-162.

646    - Andrews S. 2010. FastQC: A Quality Control Tool for High Throughput  
647    Sequence Data [Online].

648    - Baia-da-Silva DC, Alvarez LCS, Lizcano OV, Costa FTM, Lopes SCP, Orfanó  
649    AS, Pascoal DO, Nacif-Pimenta R, Rodriguez IC, Guerra M das GVB, Lacerda  
650    MVG, Secundino NFC, Monteiro WM, Pimenta PFP. 2018. The role of the  
651    peritrophic matrix and red blood cell concentration in *Plasmodium vivax*

- 652 infection of *Anopheles aquasalis*. *Parasit Vectors* **11**(1).  
653 <https://doi.org/10.1186/s13071-018-2752-5>
- 654 - Bae Y, Jo Y, Patnaik B, Kim B, Park K, Edosa T, *et al.* 2021. *Tenebrio molitor*  
655 Spätzle 1b Is Required to Confer Antibacterial Defense Against Gram-Negative  
656 Bacteria by Regulation of Antimicrobial Peptides. *Front Physiol* **12**. doi:  
657 10.3389/fphys.2021.758859
- 658 - Beerntsen B, James A, Christensen B. 2000. Genetics of Mosquito Vector  
659 Competence. *Microbiol. Mol Biol Rev* **64**(1): 115-137.
- 660 - Bensch S, Hellgren O, Pérez-Tris J. 2009. MalAvi: a public database of  
661 malaria parasites and related haemosporidians in avian hosts based on  
662 mitochondrial cytochrome b lineages. *Mol Ecol Resour* **9**(5): 1353-1358.
- 663 - Bolger A, Lohse M, Usadel B. (2014). Trimmomatic: a flexible trimmer for  
664 Illumina sequence data. *Bioinformatics* **30**(15): 2114-2120.
- 665 - Bonizzoni M, Gasperi G, Chen X, James A. 2013. The invasive mosquito  
666 species *Aedes albopictus*: current knowledge and future perspectives. *Trends*  
667 *Parasitol* **29**(9): 460-468.
- 668 - Bonizzoni M, Dunn W, Campbell C, Olson K, Marinotti O, James A. 2012.  
669 Strain variation in the transcriptome of the dengue fever vector, *Aedes aegypti*.  
670 *G3 (Bethesda, Md)* **2**(1): 103-114. <https://doi.org/10.1534/g3.111.001107>
- 671 - Bonnot T, Gillard M, Nagel D. 2019. A Simple Protocol for Informative  
672 Visualization of Enriched Gene Ontology Terms. *Bio Protoc* **9**(22). doi:  
673 10.21769/bioprotoc.3429

- 674 - Borges-Veloso A, Saboia-Vahia L, Cuervo P, Pires R, Britto C, Fernandes N,  
675 *et al.* 2012. Proteolytic profiling and comparative analyses of active trypsin-like  
676 serine peptidases in preimaginal stages of *Culex quinquefasciatus*. *Parasite*  
677 *Vector* **5**(1). doi: 10.1186/1756-3305-5-123
- 678 - Borovsky D, Schlein Y. 1988. Quantitative determination of trypsinlike and  
679 chymotrypsinlike enzymes in insects. *Arch Insect Biochem Physiol* **8**(4): 249-  
680 260.
- 681 - Borovsky D, Schlein Y. 1987. Trypsin and chymotrypsin-like enzymes of the  
682 sandfly *Phlebotomus papatasi* infected with *Leishmania* and their possible role  
683 in vector competence. *Med Vet Entomol* **1**(3): 235-242.
- 684 - Chen Y, Lu H, Liu Q, Huang G, Lim C, Zhang L. *et al.* 2012. Function of  
685 GRIM-19, a Mitochondrial Respiratory Chain Complex I Protein, in Innate  
686 Immunity. *J Biol Chem* **287**(32): 27227-27235.
- 687 - Cirimotich C, Dong Y, Garver L, Sim S, Dimopoulos G. 2010. Mosquito  
688 immune defenses against *Plasmodium* infection. *Dev Comp Immunol* **34**(4):  
689 387-395.
- 690 - Clayton AM, Dong Y, Dimopoulos G. 2014. The Anopheles innate immune  
691 system in the defense against malaria infection. *J Innate Immun* **6**: 169-181.
- 692 - Dana AN, Hong Y, Kern MK, Hillenmeyer ME, Harker B, Lobo NF, *et al.* 2005.  
693 Gene expression patterns associated with blood-feeding in the malaria  
694 mosquito *Anopheles gambiae*. *BMC Genet* **6**(1). doi: 10.1186/1471-2164-6-5
- 695 - De Gregorio E. 2002. The Toll and Imd pathways are the major regulators of  
696 the immune response in *Drosophila*. *EMBO J* **21**(11): 2568-2579.

- 697 - Dobin A, Davis C, Schlesinger F, Drenkow J, Zaleski C, Jha S, *et al.* 2012.  
698 STAR: ultrafast universal RNA-seq aligner. *Bioinformatics* **29**(1): 15-21.
- 699 - Egerhill M. 2022. MalAvi. 244.92. <http://130.235.244.92/Malavi/about.html>  
700 (Accessed December 21, 2022)
- 701 - Etebari K, Hegde S, Saldaña M, Widen S, Wood T, Asgari S, Hughes G. 2017.  
702 Global transcriptome analysis of *Aedes aegypti* mosquitoes in response to Zika  
703 virus infection. *MSphere* **2**(6). <https://doi.org/10.1128/mSphere.00456-17>
- 704 - Ewels P, Magnusson M, Lundin S, Käller M. 2016. MultiQC: summarize  
705 analysis results for multiple tools and samples in a single report. *Bioinformatics*  
706 **32**(19): 3047-3048.
- 707 - Ferreira FC, Videvall E, Seidl CM, Wagner NE, Kilpatrick AM, Fleischer RC,  
708 Fonseca DM. 2022. Transcriptional response of individual Hawaiian *Culex*  
709 *quinquefasciatus* mosquitoes to the avian malaria *parasite Plasmodium*  
710 *relictum*. *Malar J* **21**(1): 249. <https://doi.org/10.1186/s12936-022-04271-x>
- 711 - Foo A., Thompson P, Chen S-H, Jadi R, Lupo B, DeRose E, Arora S,  
712 Placentra V, Premkumar L, Perera L, Pedersen L, Martin N, Mueller G. 2021.  
713 The mosquito protein AEG12 displays both cytolytic and antiviral properties via  
714 a common lipid transfer mechanism. *Proc Natl Acad Sci USA* **118**(11):  
715 e2019251118
- 716 - Frolet C, Thoma M, Blandin S, Hoffmann JA, Levashina EA. 2006. Boosting  
717 NF-kappaB-dependent basal immunity of *Anopheles gambiae* aborts  
718 development of *Plasmodium berghei*. *Immunity* **25**(4): 677-685.  
719 <https://doi.org/10.1016/j.immuni.2006.08.019>



- 720 - García-Longoria L, Palinauskas V, Ilgūnas M, Valkiūnas G, Hellgren O. 2020.  
721 Differential gene expression of *Plasmodium homocircumflexum* (lineage  
722 pCOLL4) across two experimentally infected passerine bird species. *Genomics*  
723 **112**(4): 2857-2865.
- 724 - García-Longoria L, Ahrén D, Berthomieu A, Kalbskopf V, Rivero A, Hellgren O.  
725 2022. Immune gene expression in the mosquito vector *Culex quinquefasciatus*  
726 during an avian malaria infection. *Mol Ecol* <https://doi.org/10.1111/mec.16799>
- 727 - Gemmell N, Akiyama S. 1996. An efficient method for the extraction of DNA  
728 from vertebrate tissues. *Trends Genet* **12**(9): 338-339.
- 729 - Giraldo-Calderón G, Emrich S, MacCallum R, Maslen G, Dialynas E, Topalis  
730 P, *et al.* 2015. VectorBase: an updated bioinformatics resource for invertebrate  
731 vectors and other organisms related with human diseases. *Nucleic Acids Res*  
732 **43**(D1): D707-D713.
- 733 - Gunay F, Picard M, Robert V. 2018. MosKeyTool, an interactive identification  
734 key for mosquitoes of Euro-Mediterranean. Version 2.1. 2018. Available from:  
735 <http://www.medilabsecure.com/moskeytool>.
- 736 - Gutiérrez-López R, Martínez-de la Puente J, Gangoso L, Soriguer R,  
737 Figuerola J. 2020. *Plasmodium* transmission differs between mosquito species  
738 and parasite lineages. *Parasitology* **147**(4): 441-447.
- 739 - Gwadz R, Kaslow D, Lee J, Maloy W, Zaslhoff M, Miller L. 1989. Effects of  
740 magainins and cecropins on the sporogonic development of malaria parasites in  
741 mosquitoes. *Infect Immun* **57**(9): 2628-2633.

- 742 - Han YS. 2000. Molecular interactions between *Anopheles stephensi* midgut  
743 cells and *Plasmodium berghei*: the time bomb theory of ookinete invasion of  
744 mosquitoes. *EMBO J* **19**(22): 6030-6040.
- 745 - Hegedus D, Erlandson M, Gillott C, Toprak U. 2009. New Insights into  
746 Peritrophic Matrix Synthesis, Architecture, and Function. *Annu Rev Entomol*  
747 **54**(1): 285-302.
- 748 - Hellgren O, Waldenström J, Bensch S. 2004. A new PCR assay for  
749 simultaneous studies of leucocytozoon, *Plasmodium*, and *Haemoproteus* from  
750 avian blood. *J Parasitol* **90**(4): 797-802.
- 751 - Higgs S, Beaty BJ. 2005. Natural cycles of vector-borne pathogens. Biology of  
752 disease vectors. In *Biology of disease vectors*, 2nd ed. (ed. Marquardt WC, et  
753 al.). Elsevier Academic Press, New York.
- 754 - Hillyer J. 2016. Insect immunology and hematopoiesis. *Dev Comp Immunol*  
755 **58**: 102-118.
- 756 - Huber W, Carey V, Gentleman R, Anders S, Carlson M, Carvalho B, et al.  
757 2015. Orchestrating high-throughput genomic analysis with Bioconductor. *Nat*  
758 *Methods* **12**(2): 115-121.
- 759 - Janeh M, Osman D, Kambris Z. 2019. Comparative Analysis of Midgut  
760 Regeneration Capacity and Resistance to Oral Infection in Three Disease-  
761 Vector Mosquitoes. *Sci Rep* **9**(1). doi: 10.1038/s41598-019-50994-4
- 762 - Jaynes J, Burton C, Barr S, Jeffers G, Julian G, White K, et al. 1988. In vitro  
763 cytotoxic effect of novel lytic peptides on *Plasmodium falciparum* and  
764 *Trypanosoma cruzi*. *FASEB J* **2**(13): 2878-2883.

- 765 - Jiang H, Vilcinskas A, Kanost MR. 2010. Immunity in lepidopteran insects. *Adv*  
766 *Exp Med Biol* **708**:181-204. [https://doi.org/10.1007/978-1-4419-8059-5\\_10](https://doi.org/10.1007/978-1-4419-8059-5_10)
- 767 - Kazlauskienė R, Bernotienė R, Palinauskas V, Iezhova TA, Valkiūnas G. 2013.  
768 *Plasmodium relictum* (lineages pSGS1 and pGRW11): complete synchronous  
769 sporogony in mosquitoes *Culex pipiens pipiens*. *Exp Parasitol* **133**(4): 454-461.  
770 <https://doi.org/10.1016/j.exppara.2013.01.008>
- 771 - Kearse M, Moir R, Wilson A, Stones-Havas S, Cheung M, Sturrock S, *et al.*  
772 2012. Geneious Basic: An integrated and extendable desktop software platform  
773 for the organization and analysis of sequence data. *Bioinformatics* **28**(12):  
774 1647-1649.
- 775 - Kim W, Koo H, Richman A, Seeley D, Vizioli J, Klocko A, O'brochta D. 2004.  
776 Ectopic Expression of a Cecropin Transgene in the Human Malaria Vector  
777 Mosquito *Anopheles gambiae* (Diptera: Culicidae): Effects on Susceptibility to  
778 *Plasmodium*. *J Med Entomol* **41**(3): 447-455.
- 779 - Korshunov SS, Skulachev VP, Starkov AA. 1997. High protonic potential  
780 actuates a mechanism of production of reactive oxygen species in  
781 mitochondria. *FEBS Lett* **416**: 15–18
- 782 - Kowaltowski A, de Souza-Pinto N, Castilho, Vercesi A. 2009. Mitochondria  
783 and reactive oxygen species. *Free Radic Biol Med* **47**(4): 333-343.
- 784 - Kumar A, Srivastava P, Sirisena P, Dubey S, Kumar R, Shrinet J, Sunil S.  
785 2018. Mosquito Innate Immunity. *Insects* **9**(3): 95.
- 786 - Kumar M, Mohanty A, Sreenivasamurthy S, Dey G, Advani J, Pinto S, *et al.*  
787 2017. Response to Blood Meal in the Fat Body of *Anopheles stephensi* Using

- 788 Quantitative Proteomics: Toward New Vector Control Strategies Against  
789 Malaria. *OMICS J Integr Biol* **21**(9): 520-530.
- 790 - Kumar S, Christophides GK, Cantera R, Charles B, Han YS, Meister S. 2003.  
791 The role of reactive oxygen species on *Plasmodium* melanotic encapsulation in  
792 *Anopheles gambiae*. *Biol Sci* **100**(24): 14139-14144.
- 793 - Lehane MJ. 2010. *The biology of blood-sucking in insects*, 2nd ed. Cambridge  
794 University Press, Cambridge.
- 795 - Lehane M. 1997. Peritrophic matrix structure and function. *Annu Rev Entomol*  
796 **42**(1): 525-550.
- 797 - Li B, Dewey C. 2011. RSEM: accurate transcript quantification from RNA-Seq  
798 data with or without a reference genome. *BMC Bioinform* **12**(1). doi:  
799 10.1186/1471-2105-12-323
- 800 - Love M, Huber W, Anders S. 2014. Moderated estimation of fold change and  
801 dispersion for RNA-seq data with DESeq2. *Genome Biol* **15**(12). doi:  
802 10.1186/s13059-014-0550-8
- 803 - Memarpoor-Yazdi M, Zare-Zardini H, Asoodeh A. 2013. A Novel Antimicrobial  
804 Peptide Derived from the Insect *Paederus dermatitis*. *Int J Pept Res Ther* **19**(2):  
805 99-108.
- 806 - Michel K, Kafatos F. 2005. Mosquito immunity against *Plasmodium*. *Insect*  
807 *Biochem Mol Biol* **35**(7): 677-689.
- 808 - Molina-Cruz A, Bennett K, Barillas-Mury C, Richardson J, Black W, Gupta L.  
809 2005. Effect of mosquito midgut trypsin activity on dengue-2 virus infection and  
810 dissemination in *Aedes aegypti*. *Am J Trop Med Hyg* **72**(5): 631-637.

- 811 - Molina-Cruz A, DeJong RJ, Charles B, Gupta L, Kumar S, Jaramillo-Gutiérrez  
812 G, *et al.* 2008 Reactive oxygen species modulate *Anopheles gambiae* immunity  
813 against bacteria and *Plasmodium*. *J Biol Chem* **283**: 3217–3223.
- 814 - Morlais I, Mori A, Schneider J, Severson D. 2003. A targeted approach to the  
815 identification of candidate genes determining susceptibility to *Plasmodium*  
816 *gallinaceum* in *Aedes aegypti*. *Mol Genet Genomics* **269**(6): 753-764.
- 817 - Muller H, Catteruccia F, Vizioli J, Dellatorre A, Crisanti A. 1995. Constitutive  
818 and Blood Meal-Induced Trypsin Genes in *Anopheles gambiae*. *Exp Parasitol*  
819 **81**(3): 371-385.
- 820 - Nallar S, Kalvakolanu D. 2017. GRIM-19: A master regulator of cytokine  
821 induced tumor suppression, metastasis and energy metabolism. *Cytokine*  
822 *Growth Factor Rev* **33**: 1-18.
- 823 - Nászai M, Carroll L, Cordero J. 2015. Intestinal stem cell proliferation and  
824 epithelial homeostasis in the adult *Drosophila* midgut. *Insect Biochem Mol Biol*  
825 **67**: 9-14.
- 826 - R Core Team. 2021. R: A language and environment for statistical computing.  
827 R Foundation for Statistical Computing, Vienna, Austria. URL [https://www.R-](https://www.R-project.org/)  
828 [project.org/](https://www.R-project.org/).
- 829 - Serrano-Pinto V, Acosta-Pérez M, Luviano-Bazán D, Hurtado-Sil G, Batista  
830 CVF, Martínez-Barnetche J, Lánz-Mendoza H. 2010. Differential expression of  
831 proteins in the midgut of *Anopheles albimanus* infected with *Plasmodium*  
832 *berghei*. *Insect Biochem. Mol Biol* **40**(10): 752-758.  
833 <https://doi.org/10.1016/j.ibmb.2010.07.011>

- 834 - Shahabuddin M, Lemos F, Kaslow D, Jacobs-Lorena M. 1996. Antibody  
835 mediated inhibition of *Aedes aegypti* midgut trypsins blocks sporogonic  
836 development of *Plasmodium gallinaceum*. *Infect Immun* **64**(3): 739-743.
- 837 - Shao L, Devenport M, Fujioka H, Ghosh A, Jacobs-Lorena M. 2005.  
838 Identification and characterization of a novel peritrophic matrix protein, Ae-  
839 Aper50, and the microvillar membrane protein, AEG12, from the mosquito,  
840 *Aedes aegypti*. *Insect Biochem Mol Biol* **35**(9): 947-959.
- 841 - Shen W, He P, Xiao C, Chen X. 2018. From Antimicrobial Peptides to  
842 Antimicrobial Poly( $\alpha$ -amino acid)s. *Adv Healthc Mater* **7**(20): 1800354. doi:  
843 10.1002/adhm.201800354
- 844 - Shia A, Glittenberg M, Thompson G, Weber A, Reichhart J, Ligoxygakis P.  
845 2009. Toll-dependent antimicrobial responses in *Drosophila* larval fat body  
846 require Spätzle secreted by haemocytes. *J Cell Sci* **122**(24): 4505-4515. doi:  
847 10.1242/jcs.049155
- 848 - Shin S, Bian G, Raikhel A. 2006. A Toll Receptor and a Cytokine, Toll5A and  
849 Spz1C, Are Involved in Toll Antifungal Immune Signaling in the Mosquito *Aedes*  
850 *aegypti*. *J Biol Chem* **281**(51): 39388-39395.
- 851 - Sinden R. 2002. Molecular interactions between *Plasmodium* and its insect  
852 vectors. *Cell Microbiol* **4**(11): 713-724.
- 853 - Sinden R. 1983. Sexual Development of Malarial Parasites. *Adv Parasitol* **22**:  
854 153-216.
- 855 - Taracena M, Bottino-Rojas V, Talyuli O, Walter-Nuno A, Oliveira J, Angleró-  
856 Rodríguez Y, *et al.* 2018. Regulation of midgut cell proliferation impacts *Aedes*

- 857 *aegypti* susceptibility to dengue virus. *PLoS Negl Trop. Dis.* **12**(5): e0006498.  
858 doi: 10.1371/journal.pntd.0006498
- 859 - Valkiūnas G. 2005. Avian Malaria Parasites and Other Haemosporidia. CRC  
860 Press, New York.
- 861 -Valkiūnas G, Iezhova TA. 2018. Keys to the avian malaria parasites. *Malar J*  
862 **17**(1). <https://doi.org/10.1186/s12936-018-2359-5>
- 863 - Valkiūnas G, Žiegytė R, Palinauskas V, Bernotienė R, Bukauskaitė D, Ilgūnas  
864 M, Dimitrov D, Iezhova TA. 2015. Complete sporogony of *Plasmodium relictum*  
865 (lineage pGRW4) in mosquitoes *Culex pipiens pipiens*, with implications on  
866 avian malaria epidemiology. *Parasitol Res* **114**(8): 3075-3085.  
867 <https://doi.org/10.1007/s00436-015-4510-3>
- 868 - van Riper C, van Riper S, Goff M, Laird M. 1986. The Epizootiology and  
869 Ecological Significance of Malaria in Hawaiian Land Birds. *Ecol Monogr* **56**(4):  
870 327-344.
- 871 - Vizioli J, Catteruccia F, della Torre A, Reckmann I, Müller H. 2001. Blood  
872 digestion in the malaria mosquito *Anopheles gambiae*. *Eur J Biochem* **268**(14):  
873 4027-4035.
- 874 - Vizioli J, Bulet P, Charlet M, Lowenberger C, Blass C, Muller H, *et al.* 2000.  
875 Cloning and analysis of a cecropin gene from the malaria vector mosquito,  
876 *Anopheles gambiae*. *Insect Mol Biol* **9**(1): 75-84.
- 877 - Videvall E, Cornwallis CK, Palinauskas V, Valkiūnas G, Hellgren O. 2015. The  
878 avian transcriptome response to malaria infection. *Mol Biol Evol* **32**(5): 1255-  
879 1267. <https://doi.org/10.1093/molbev/msv016>

- 880 - Videvall E, Paxton K, Campana M, Cassin-Sackett L, Atkinson C, Fleischer R.  
881 2021. Transcriptome assembly and differential gene expression of the invasive  
882 avian malaria parasite *Plasmodium relictum* in Hawai'i. *Ecol Evol* **11**(9): 4935-  
883 4944.
- 884 - Videvall E, Cornwallis C, Ahrén D, Palinauskas V, Valkiūnas G, Hellgren O.  
885 2017. The transcriptome of the avian malaria parasite *Plasmodium ashfordi*  
886 displays host-specific gene expression. *Mol Ecol* **26**(11): 2939-2958.
- 887 - Vlachou D, Schlegelmilch T, Christophides G, Kafatos F. 2005. Functional  
888 Genomic Analysis of Midgut Epithelial Responses in *Anopheles* during  
889 *Plasmodium* Invasion. *Curr Biol* **15**(13): 1185-1195.
- 890 - Wickham H. 2016. *ggplot2: Elegant Graphics for Data Analysis*. Springer-  
891 Verlag, New York.
- 892 - WHO. 2021. World malaria report 2021: regional data and trends. In World  
893 Health: Vol. WHO/UCN/GMP/2021.09 (Issue December).  
894 <https://www.who.int/publications/m/item/WHO-UCN-GMP-2021.09> (Accessed  
895 May 18, 2022)
- 896 - Zou Z, Souza-Neto J, Xi Z, Kokoza V, Shin S, Dimopoulos G, Raikhel A. 2011.  
897 Transcriptome Analysis of *Aedes aegypti* Transgenic Mosquitoes with Altered  
898 Immunity. *Plos Pathog* **7**(11): e1002394. doi: 10.1371/journal.ppat.1002394  
899
